# Supplementary material for: Layered double hydroxide derived bimetallic nickel–iron selenide as an active electrocatalyst for nitrogen fixation under ambient conditions
Source: Royal Society of Chemistry journal article supplement (doi:10.1039/d0qi01437k), 2021-01-01
Supplement: d0qi01437k1.pdf [file d0qi01437k1.pdf]

## Supplementary information

### **Layered Double Hydroxide Derived Bimetallic Nickel-Iron Selenide as an Active Electrocatalyst for Nitrogen Fixation under Ambient Conditions**

Shiyu Yang,<sup>a</sup> Wen Ye,<sup>c</sup> Demei Zhang<sup>a</sup>, Xiaoyu Fang<sup>a</sup> and Dongpeng Yan<sup>\*abd</sup>

- a. Beijing Key Laboratory of Energy Conversion and Storage Materials, College of Chemistry Beijing Normal University, Beijing 100875, P. R. China. E-mail: [yandp@bnu.edu.cn](mailto:yandp@bnu.edu.cn)
- b. College of Chemistry, Key Laboratory of Radiopharmaceuticals, Ministry of Education, Beijing Normal University, Beijing 100875, P. R. China.
- c. School of Chemistry and Biological Engineering, Basic Experimental Center For Natural Science, University of Science and Technology Beijing, Beijing 100083, P. R. China
- d. College of Chemistry and Molecular Engineering, Zhengzhou University, Zhengzhou 450001, China

## **Experimental details**

### **Chemicals**

All chemical reagents were directly used without any further purification. Nickel(II) nitrate hexahydrate ( $\text{Ni}(\text{NO}_3)_2 \cdot 6\text{H}_2\text{O}$ ), iron(III) nitrate nonahydrate ( $\text{Fe}(\text{NO}_3)_3 \cdot 9\text{H}_2\text{O}$ ), triethanolamine ( $\text{N}(\text{CH}_2\text{CH}_2\text{OH})_3$ ), triethanolamine (TEA), selenium powder (Se), ammonium iron(II) sulfate ( $\text{Fe}(\text{NH}_4)_2 \cdot (\text{SO}_4)_2 \cdot 6\text{H}_2\text{O}$ ), citric acid (CA), ethyl alcohol ( $\text{C}_2\text{H}_5\text{OH}$ ), salicylic acid ( $\text{C}_7\text{H}_6\text{O}_3$ ), sodium citrate dihydrate ( $\text{C}_6\text{H}_5\text{Na}_3\text{O}_7 \cdot 2\text{H}_2\text{O}$ ), sodium nitroferricyanide dihydrate ( $\text{C}_5\text{FeN}_6\text{Na}_2\text{O} \cdot 2\text{H}_2\text{O}$ ), sodium hypochlorite solution ( $\text{NaClO}$ ), p-dimethylaminobenzaldehyde ( $\text{C}_9\text{H}_{11}\text{NO}$ ), hydrazine dihydrochloride ( $\text{N}_2\text{H}_4 \cdot \text{HCl}$ ), sodium sulfate ( $\text{Na}_2\text{SO}_4$ ), potassium sulfate ( $\text{K}_2\text{SO}_4$ ), lithium sulphat ( $\text{Li}_2\text{SO}_4$ ), carbon paper (C), 5% Nafion solution, iso-propyl alcohol ( $(\text{CH}_3)_2\text{CHOH}$ ), 211 Nafion membrane, deionized water,  $\text{N}_2$  gas (99.99%), Ar gas (99.99%),  $^{15}\text{N}_2$  gas (98%).

### **Characterization.**

The morphology, microstructure and chemical composition of the samples are characterized by field emission scanning electron microscopy (FESEM, Hitachi S-8010), pH meter (METTLER TOLEDO), transmission electron microscopy (TEM, JEOL, JEM-2100F), X-ray diffraction (XRD, Rigaku Ultima-IV), and X-ray photoelectron spectroscopy (XPS, Thermo VG ESCALAB MK II).

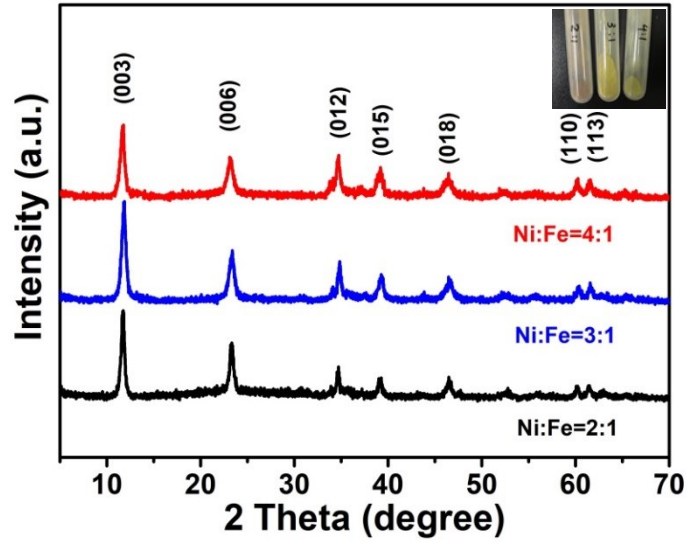

**Figure S1.** XRD image of NiFe-LDH.

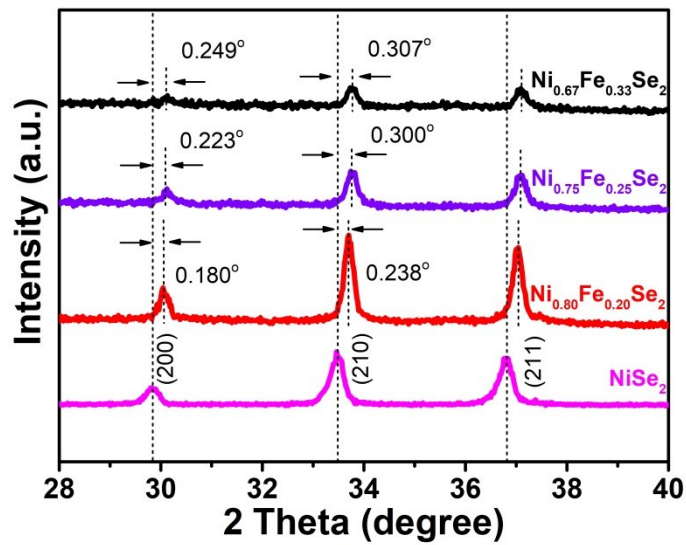

**Figure S2.** The local enlarged XRD patterns of  $\text{Ni}_{0.67}\text{Fe}_{0.33}\text{Se}_2$ ,  $\text{Ni}_{0.75}\text{Fe}_{0.25}\text{Se}_2$  and  $\text{Ni}_{0.80}\text{Fe}_{0.20}\text{Se}_2$ .

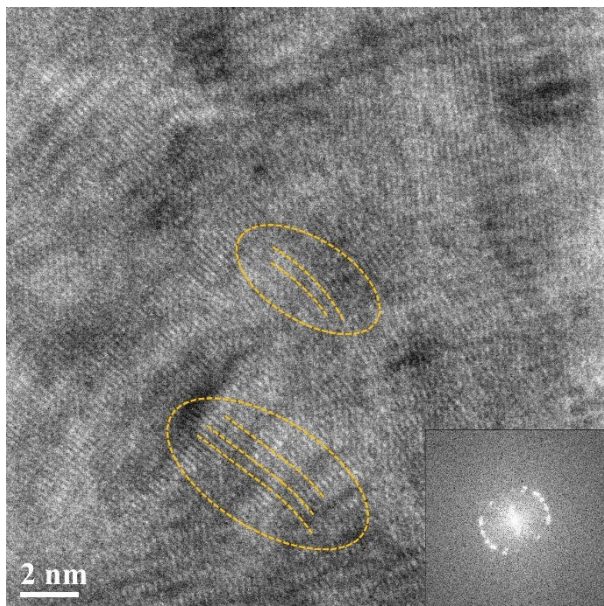

**Figure S3.** The HRTEM images and FFT patterns of Ni<sub>0.75</sub>Fe<sub>0.25</sub>Se<sub>2</sub>

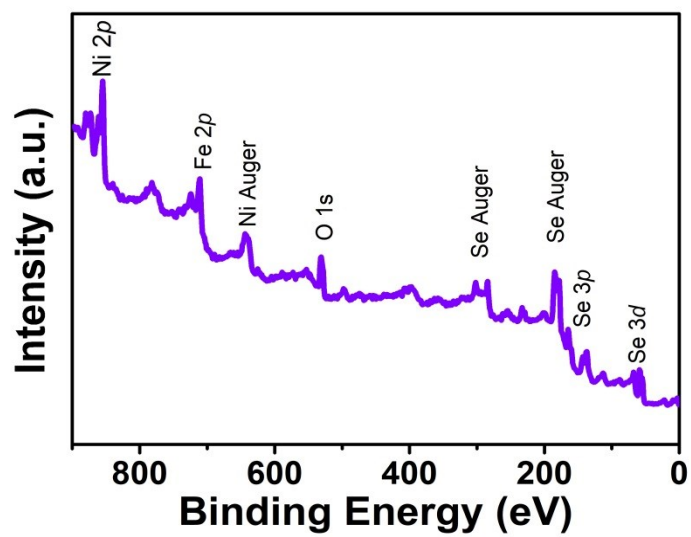

**Figure S4.** XPS survey scan spectrum of the Ni<sub>0.75</sub>Fe<sub>0.25</sub>Se<sub>2</sub> catalyst.

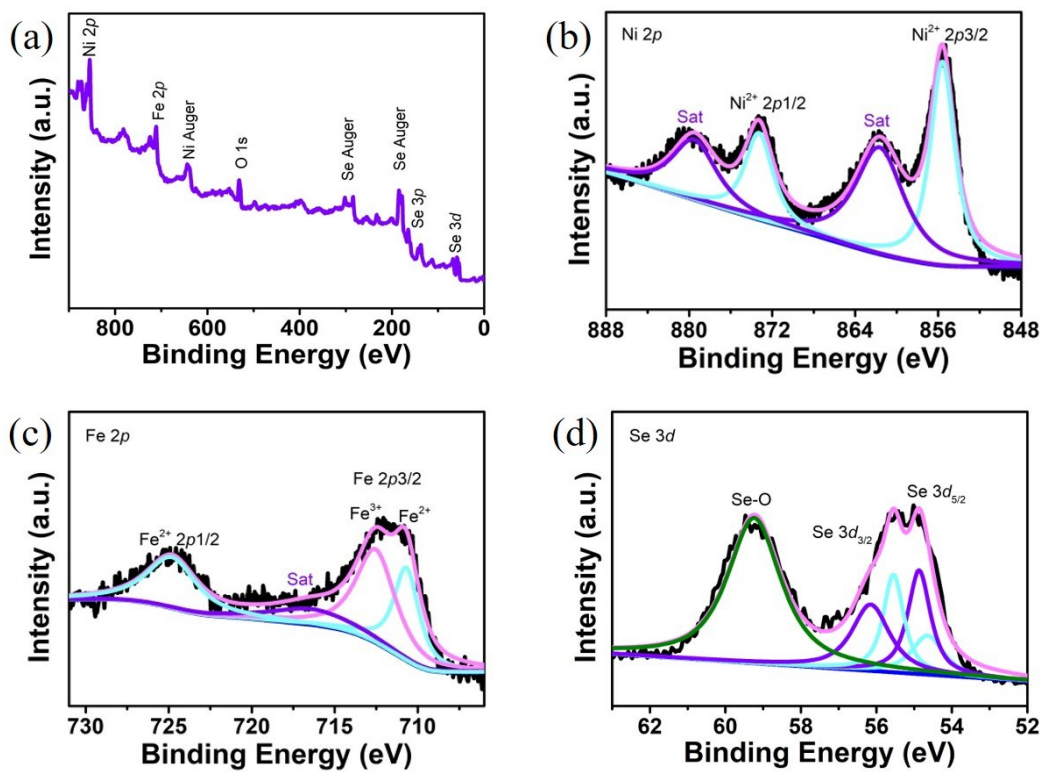

**Figure S5.** (a) XPS spectra of  $\text{Ni}_{0.67}\text{Fe}_{0.33}\text{Se}_2$ . (b) Ni 2p; (c) Fe 2p; and (d) Se 3d.

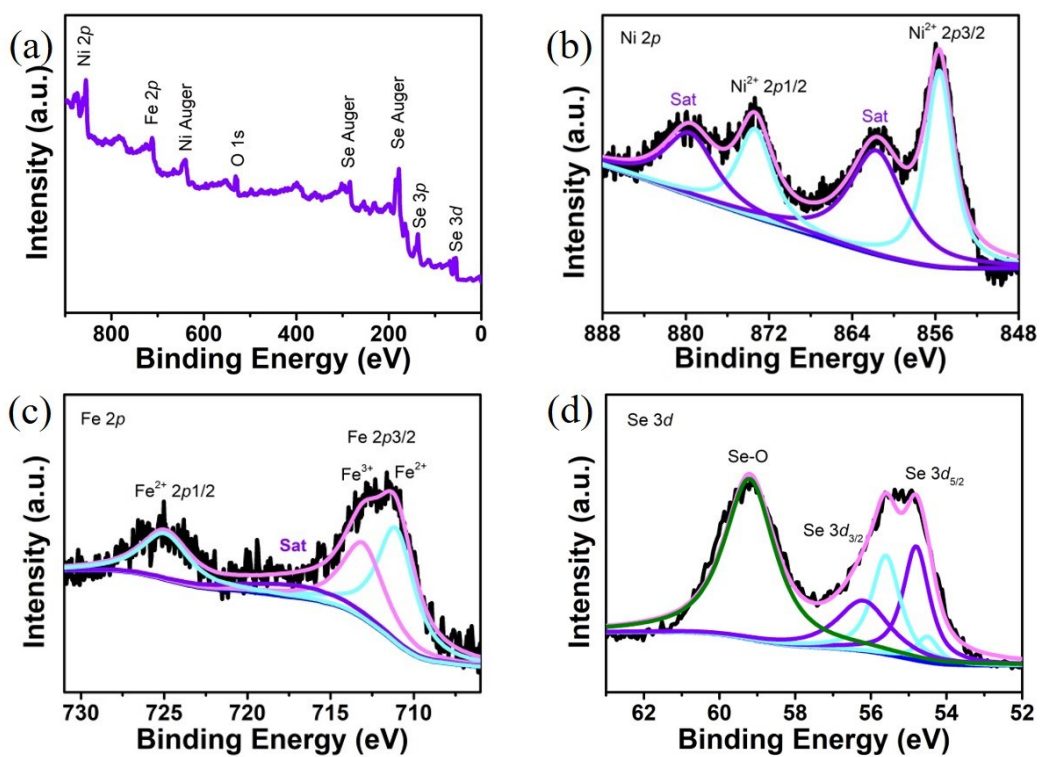

**Figure S6.** (a) XPS spectra of Ni<sub>0.80</sub>Fe<sub>0.20</sub>Se<sub>2</sub>. (b) Ni 2p; (c) Fe 2p; and (d) Se 3d.

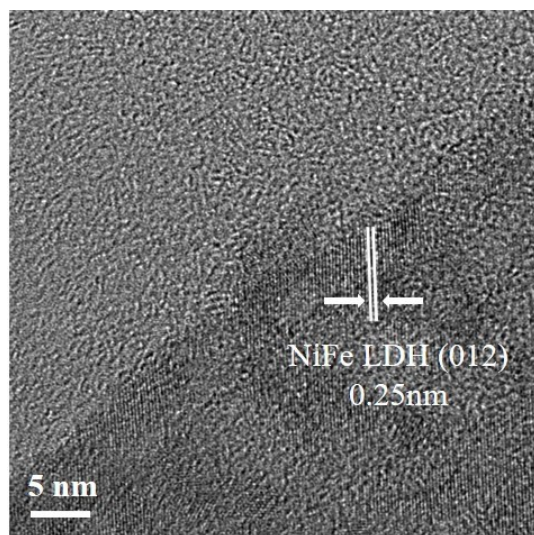

**Figure S7.** The HRTEM image of Ni<sub>0.75</sub>Fe<sub>0.25</sub>-LDH.

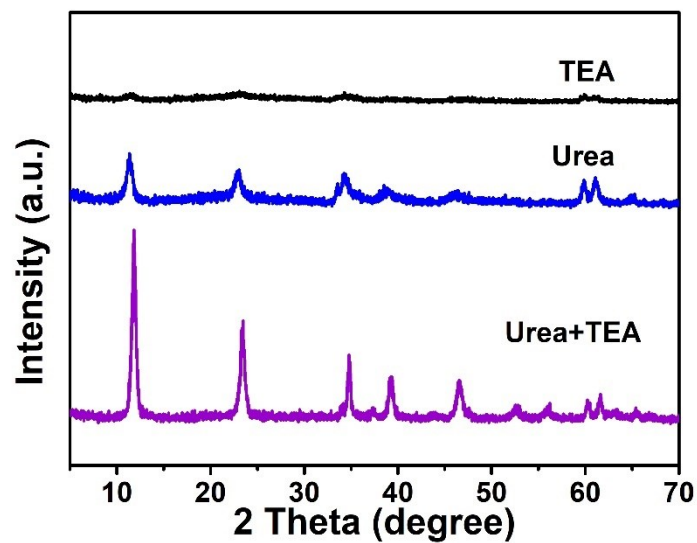

**Figure S8.** XRD image of NiFe-LDH with different basic materials.

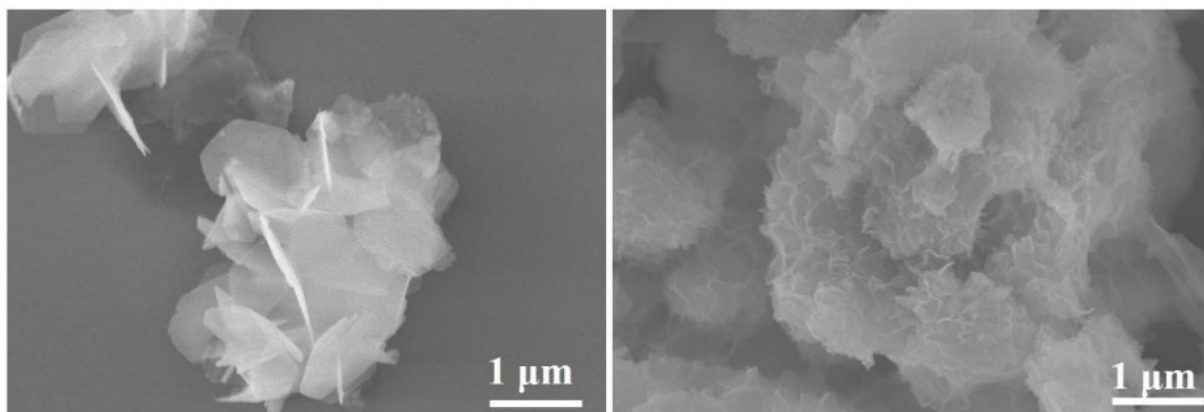

**Figure S9.** SEM images of Ni<sub>0.75</sub>Fe<sub>0.25</sub>-LDH.

(The left with urea and TEA addition, the right with urea only.)

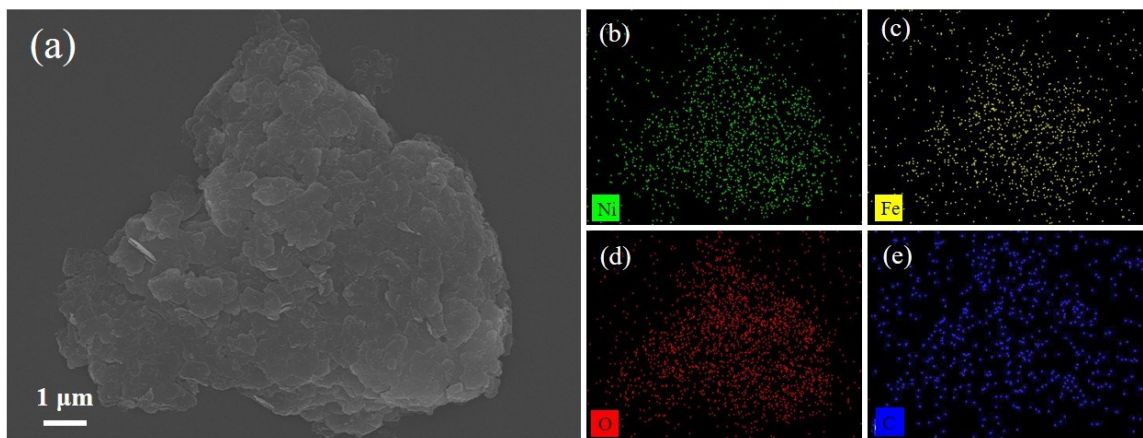

**Figure S10.** (a) SEM images and (b-e) EDS elemental mapping images of Ni<sub>0.67</sub>Fe<sub>0.33</sub>-LDH for Ni (green), Fe (golden), O (red) and C (purple).

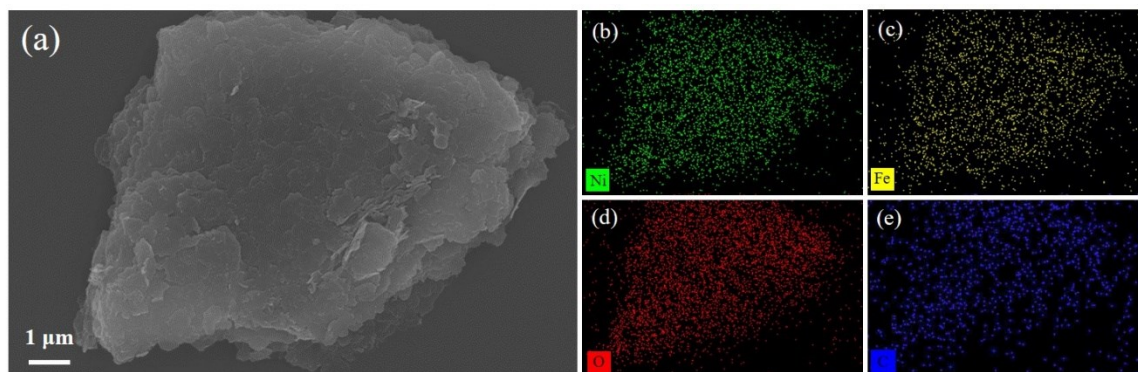

**Figure S11.** (a) SEM images and (b-e) EDS elemental mapping images of Ni<sub>0.75</sub>Fe<sub>0.25</sub>-LDH. for Ni (green), Fe (golden), O (red) and C (purple).



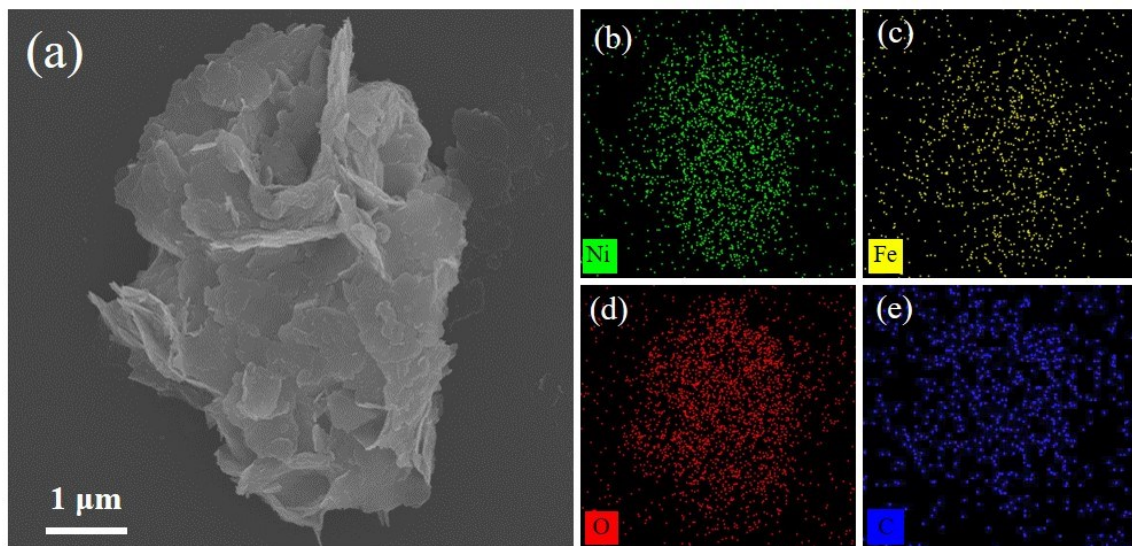

**Figure S12.** (a) SEM images and (b-e) EDS elemental mapping images of Ni<sub>0.80</sub>Fe<sub>0.20</sub>-LDH. for Ni (green), Fe (golden), O (red) and C (purple).

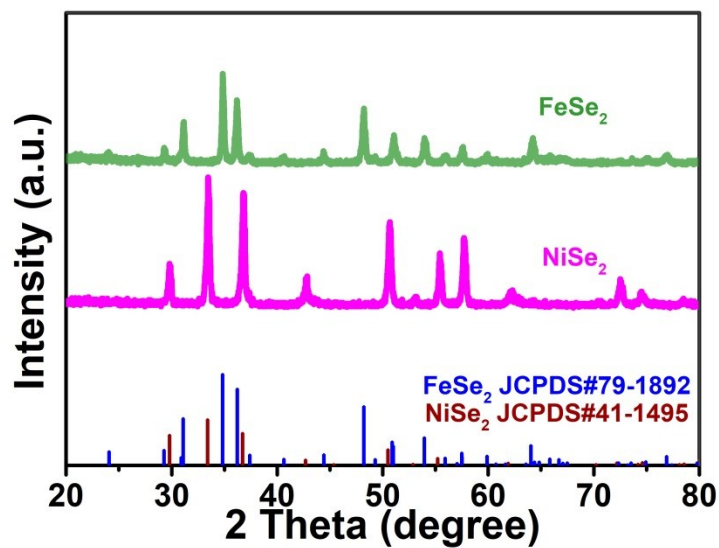

**Figure S13.** The XRD image of FeSe<sub>2</sub> and NiSe<sub>2</sub>.

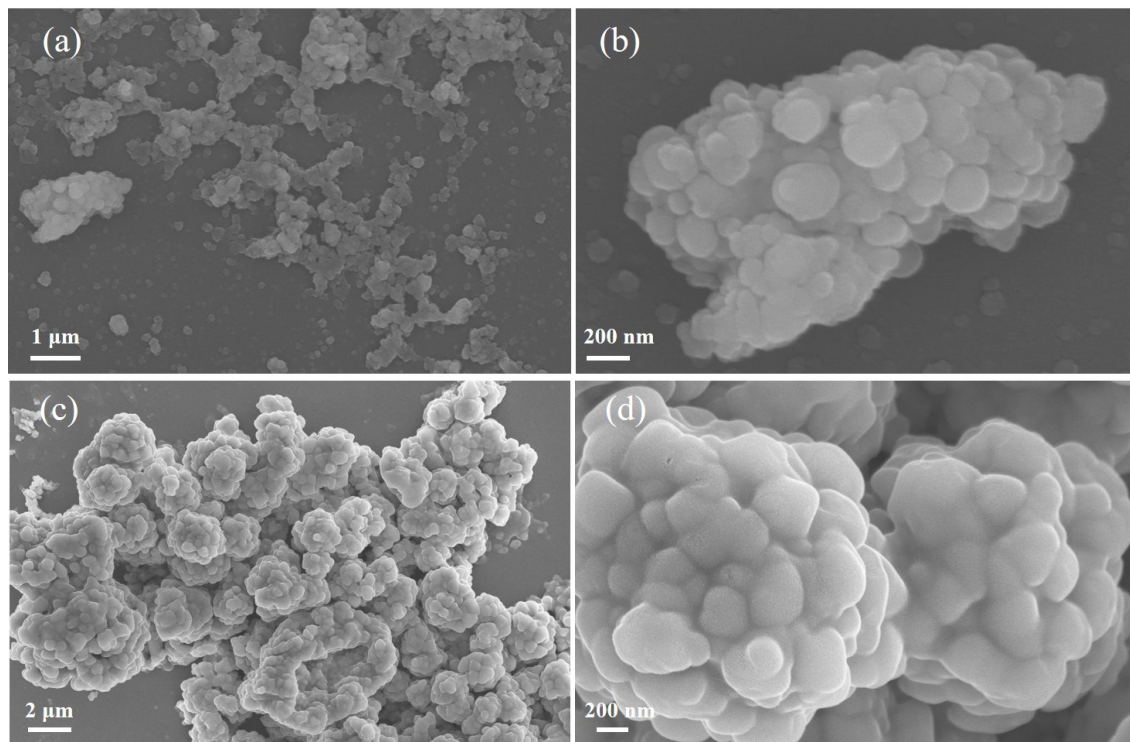

**Figure S14.** (a-b) low- and high-magnification SEM images of NiSe<sub>2</sub>.

(c-d) low- and high-magnification SEM images of FeSe<sub>2</sub>.

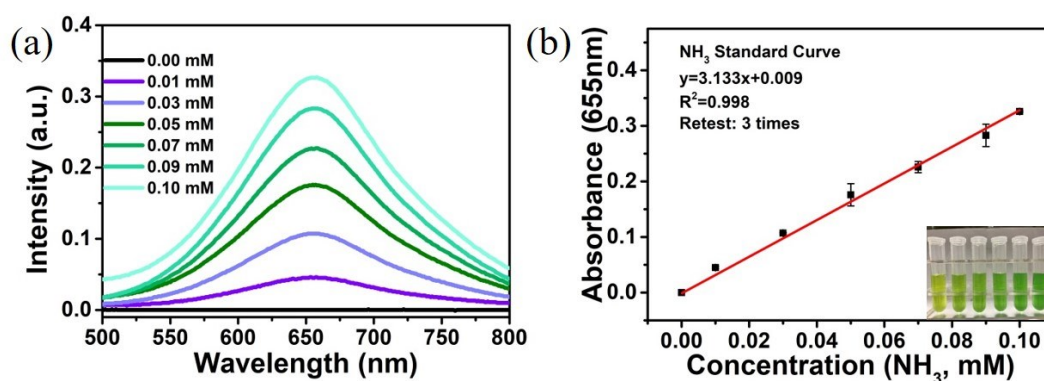

**Figure S15.** (a) UV–Vis absorption spectra of various  $\text{NH}_3$  concentrations after incubated for 2 h in 0.1 M  $\text{Li}_2\text{SO}_4$  aqueous solution at room temperature. (b) Calibration curve used for calculation of  $\text{NH}_3$  concentrations.

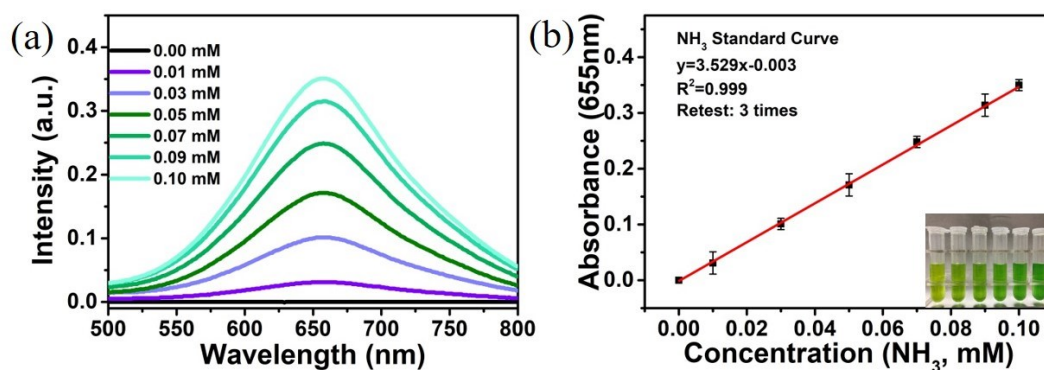

**Figure S16.** (a) UV–Vis absorption spectra of various  $\text{NH}_3$  concentrations after incubated for 2 h in 0.1 M  $\text{Na}_2\text{SO}_4$  aqueous solution at room temperature. (b) Calibration curve used for calculation of  $\text{NH}_3$  concentrations.

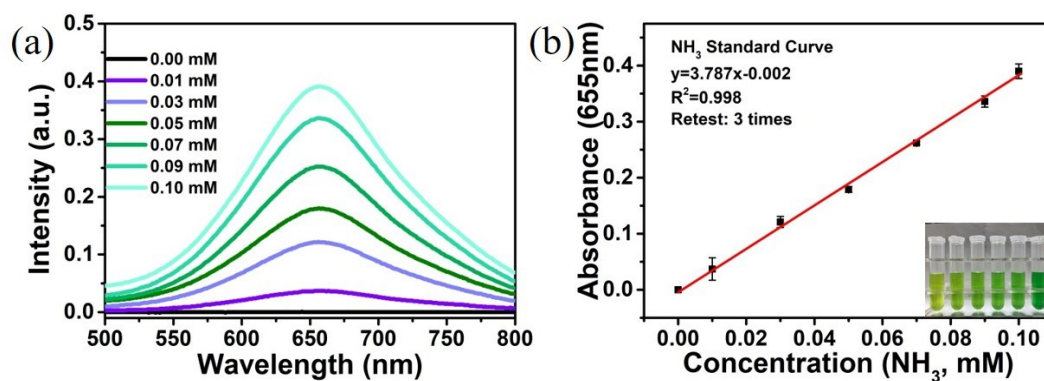

**Figure S17.** (a) UV–Vis absorption spectra of various  $\text{NH}_3$  concentrations after incubated for 2 h in 0.1 M  $\text{K}_2\text{SO}_4$  aqueous solution at room temperature. (b) Calibration curve used for calculation of  $\text{NH}_3$  concentrations.

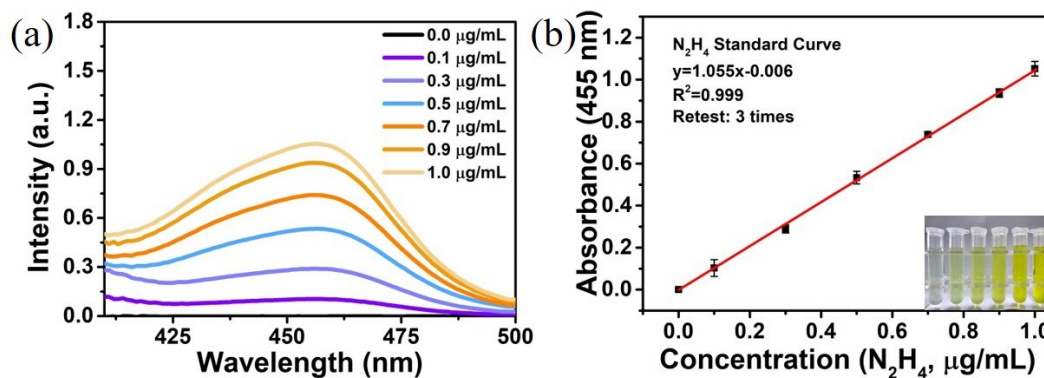

**Figure S18.** (a) UV–Vis absorption spectra of various  $\text{N}_2\text{H}_4$  concentrations after incubated for 20 min in 0.1 M  $\text{Li}_2\text{SO}_4$  aqueous solution at room temperature. (b) Calibration curve used for calculation of  $\text{N}_2\text{H}_4$  concentrations.

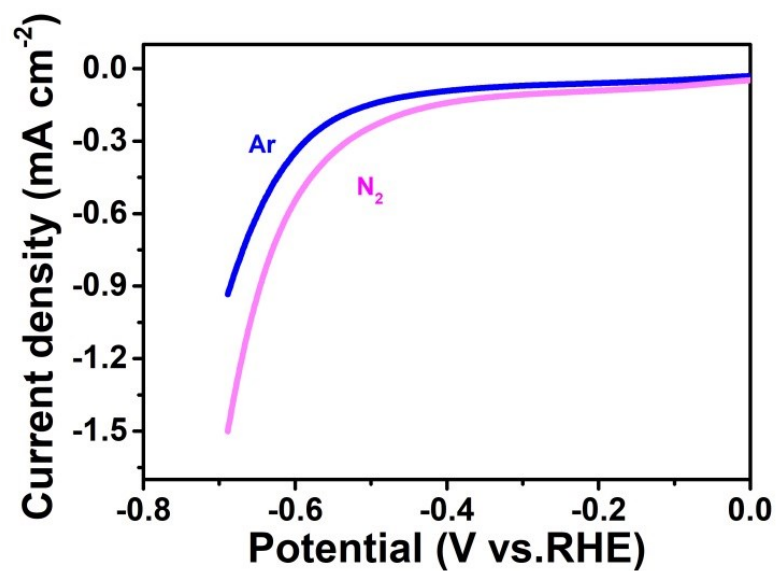

**Figure S19.** LSV curves of Ni<sub>0.75</sub>Fe<sub>0.25</sub>Se<sub>2</sub> sample in the N<sub>2</sub>-saturated and Ar-saturated 0.1 M Li<sub>2</sub>SO<sub>4</sub> aqueous solution, respectively.

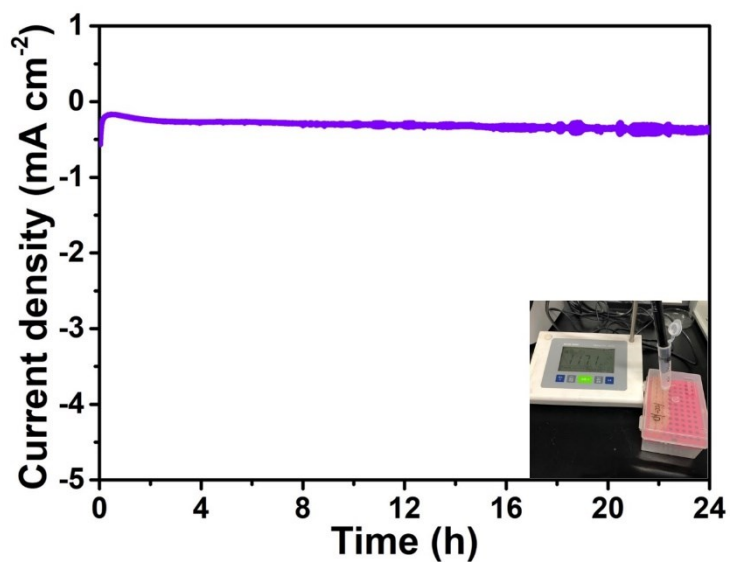

**Figure S20.** Chrono-amperometry results of Ni<sub>0.75</sub>Fe<sub>0.25</sub>-LDH for stability test (insert is the pH reading after 24h reaction).

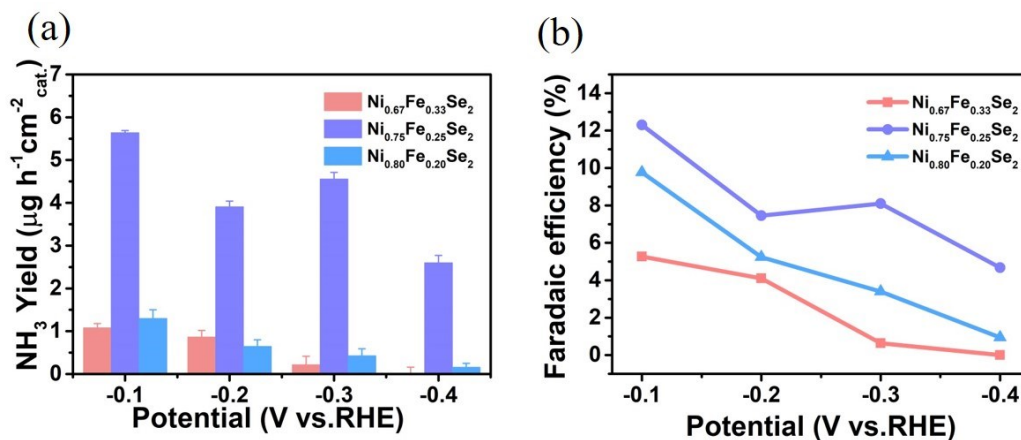

**Figure S21.** Electrocatalytic NRR of  $\text{Ni}_{0.67}\text{Fe}_{0.33}\text{Se}_2$ ,  $\text{Ni}_{0.75}\text{Fe}_{0.25}\text{Se}_2$  and  $\text{Ni}_{0.80}\text{Fe}_{0.20}\text{Se}_2$  at ambient conditions. (a) Yield rate of  $\text{NH}_3$  and (b) Faradaic efficiency at each given potential.

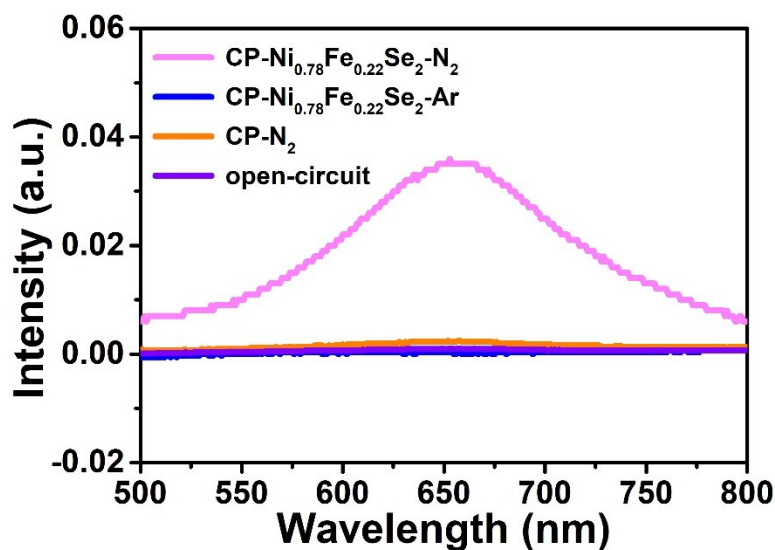

**Figure S22.** UV-Vis absorption spectra of the electrolyte stained with indophenol indicator in four different condition at  $-0.1 \text{ V vs. RHE}$ .

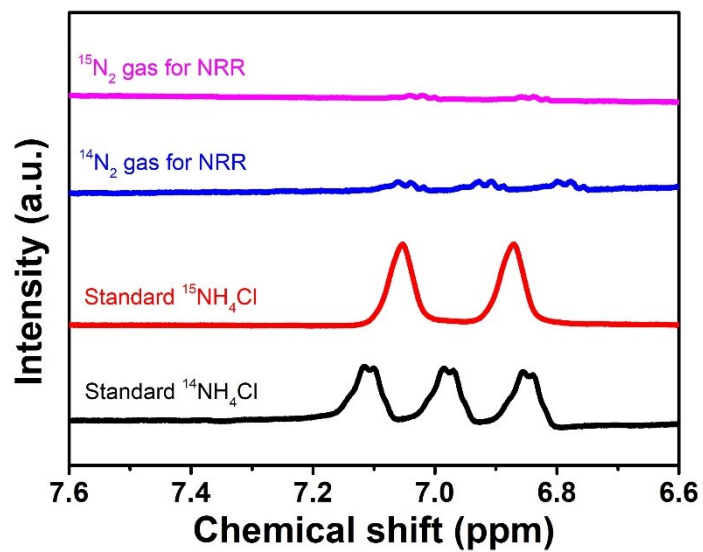

**Figure S23.**  $^1\text{H}$  NMR spectra of standard  $^{14}\text{NH}_4\text{Cl}$  and  $^{15}\text{NH}_4\text{Cl}$  solution, also the  $\text{Li}_2\text{SO}_4$  electrolyte fed by  $^{14}\text{N}_2$  and  $^{15}\text{N}_2$  after the electrolytic reaction.

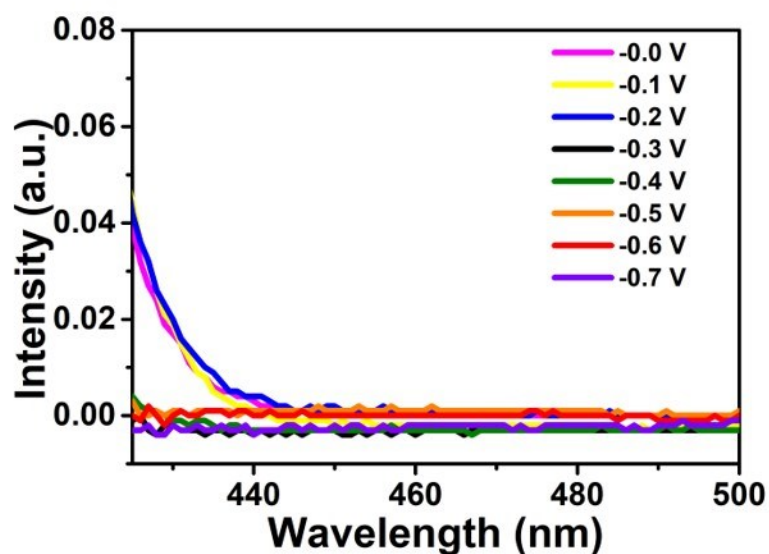

**Figure S24.** UV-Vis absorbance curves of  $\text{Ni}_{0.75}\text{Fe}_{0.25}\text{Se}_2$  in  $\text{Li}_2\text{SO}_4$  electrolytes detected by the method of Watt and Chrisp after the 2 hours NRR test at corresponding potential.

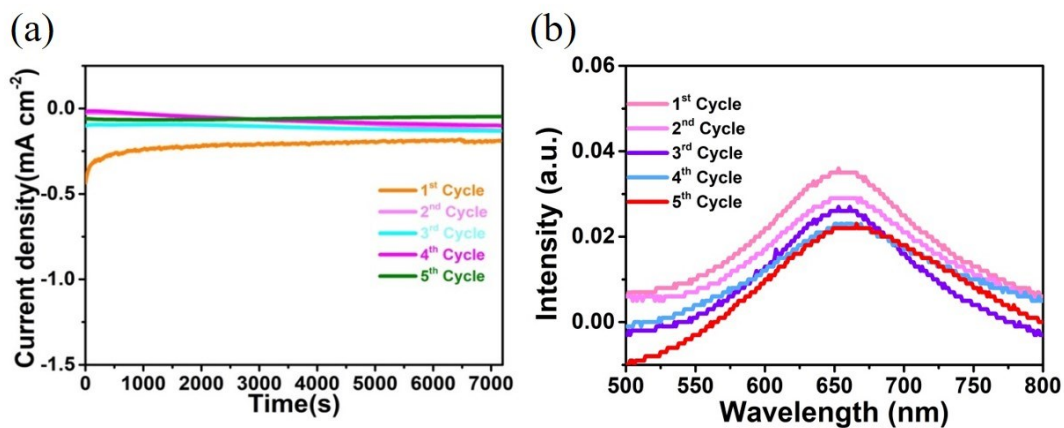

**Figure S25.** cycling test of  $\text{Ni}_{0.75}\text{Fe}_{0.25}\text{Se}_2$ . (a) Chrono-amperometry results of  $\text{Ni}_{0.75}\text{Fe}_{0.25}\text{Se}_2$  at  $-0.1$  V vs. RHE. (b) Corresponding UV-Vis absorption spectra of the electrolyte stained with indophenol indicator.



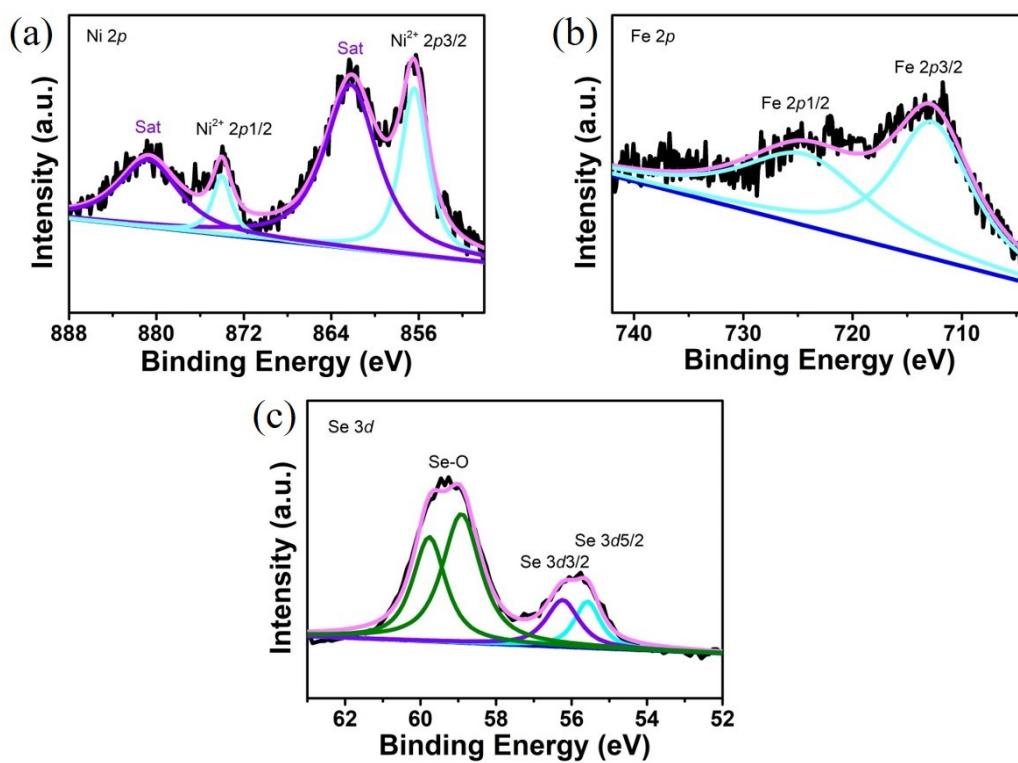

**Figure S26.** XPS spectra of  $\text{Ni}_{0.75}\text{Fe}_{0.25}\text{Se}_2$  after the stability test (the 10-h  $\text{N}_2$  reduction reaction). (a) Ni 2p; (b) Fe 2p; (c) Se 3d.

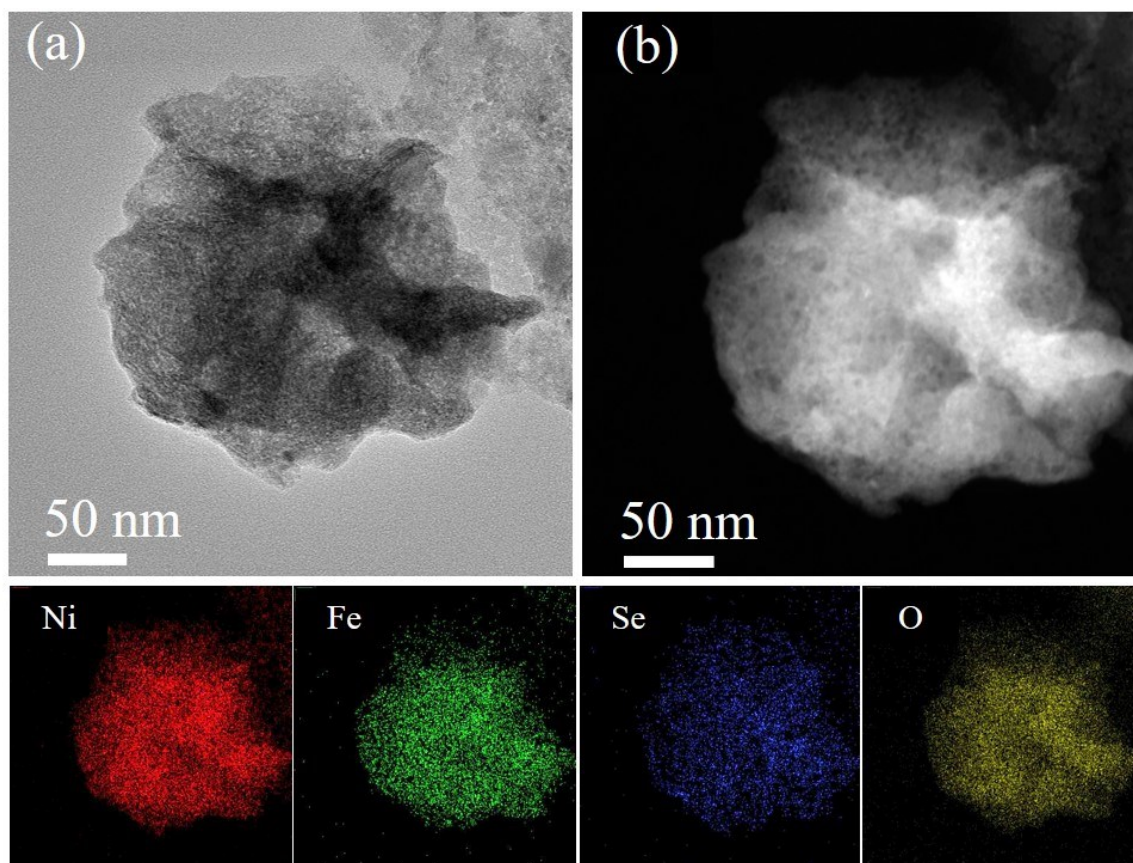

**Figure S27.** TEM image of  $\text{Ni}_{0.75}\text{Fe}_{0.25}\text{Se}_2$  after the stability test. (a) TEM image of  $\text{Ni}_{0.75}\text{Fe}_{0.25}\text{Se}_2$  after the 10-h  $\text{N}_2$  reduction reaction. (b) EDS mappings of  $\text{Ni}_{0.75}\text{Fe}_{0.25}\text{Se}_2$  after the 10-h  $\text{N}_2$  reduction reaction for Ni (red), Fe (green), Se (purple) and O (golden).

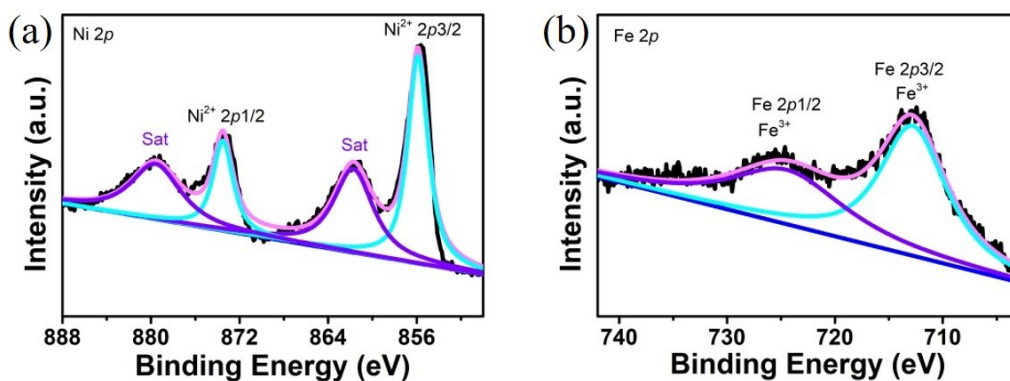

**Figure S28.** XPS spectra of  $\text{Ni}_{0.75}\text{Fe}_{0.25}\text{-LDH}$ . (a) Ni 2p; (b) Fe 2p.

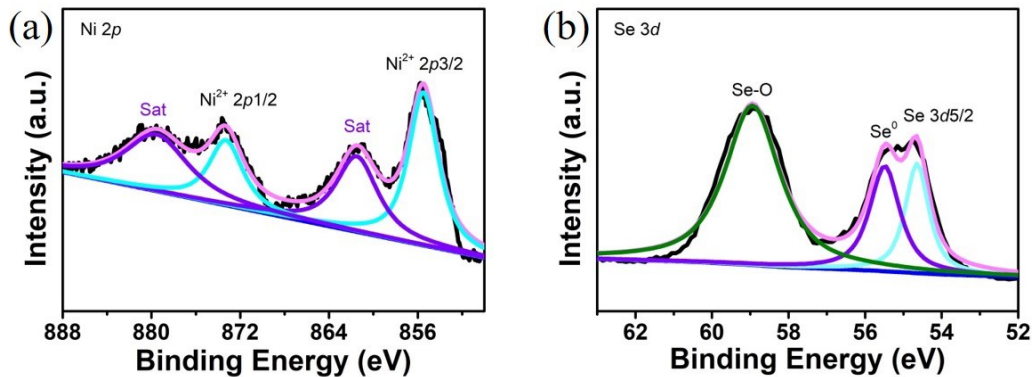

**Figure S29.** XPS spectra of  $\text{NiSe}_2$ . (a) Ni 2p; (b) Se 3d.

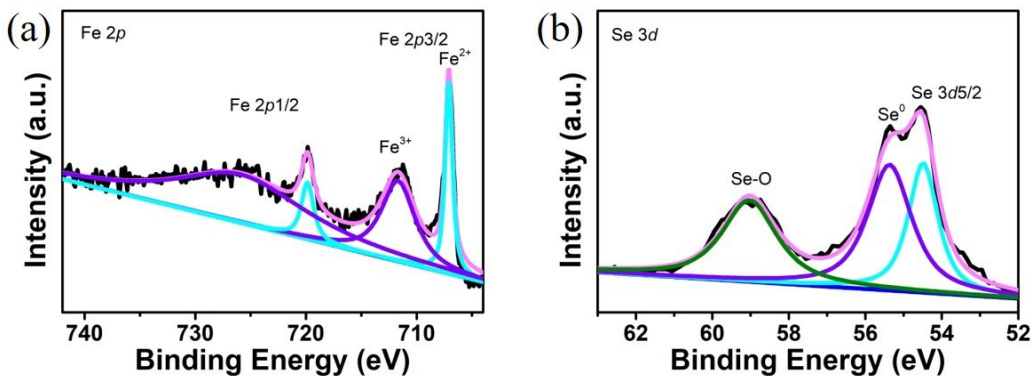

**Figure S30.** XPS spectra of  $\text{FeSe}_2$ . (a) Fe 2p; (b) Se 3d.

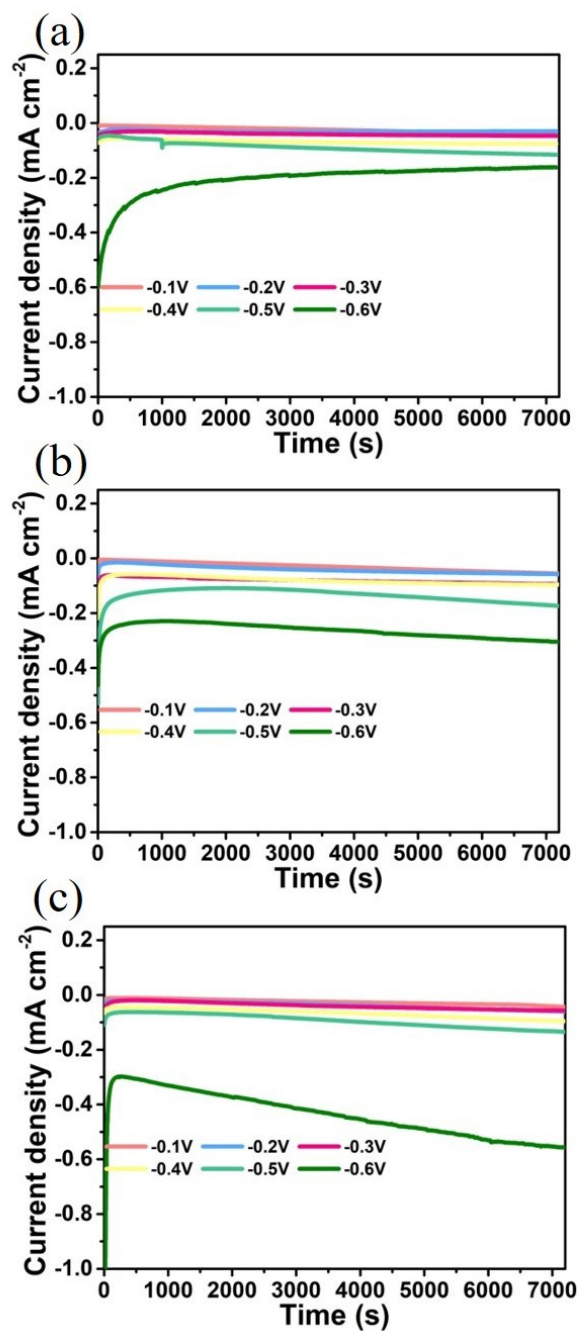

**Figure S31.** Chrono-amperometry results of (a) Ni<sub>0.75</sub>Fe<sub>0.25</sub>-LDH., (b) NiSe<sub>2</sub> and (c) FeSe<sub>2</sub> at the corresponding potentials, respectively.

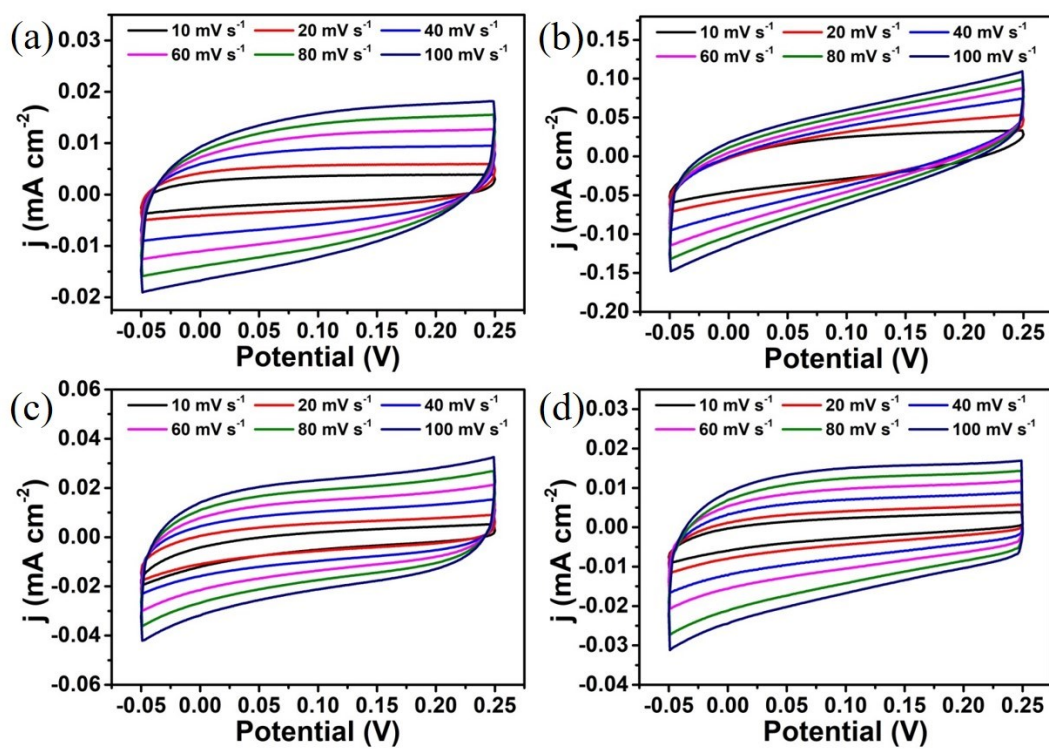

**Figure S32.** (a)-(d) Cyclic voltammograms for synthesized Ni<sub>0.75</sub>Fe<sub>0.25</sub>-LDH, Ni<sub>0.75</sub>Fe<sub>0.25</sub>Se<sub>2</sub>, NiSe<sub>2</sub> and FeSe<sub>2</sub>, respectively.

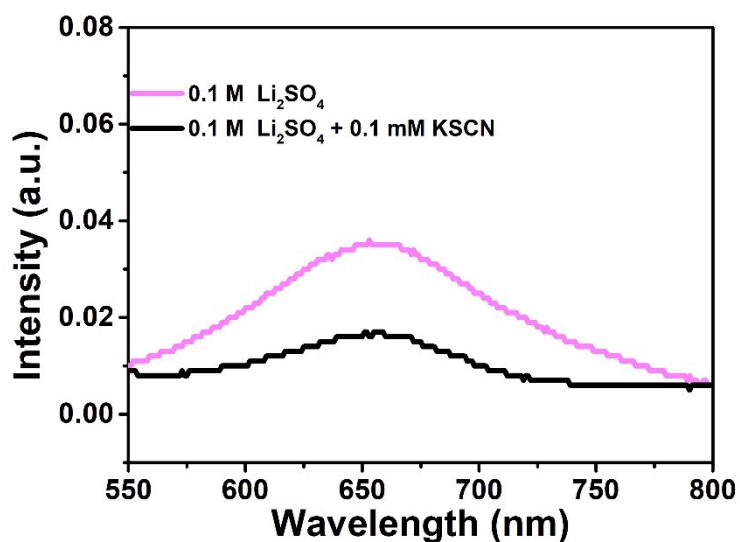

**Figure S33.** UV-Vis absorption spectra of the electrolyte of 0.1 M Li<sub>2</sub>SO<sub>4</sub> and adding 0.1 mM KSCN stained with indophenol indicator at -0.1 V vs. RHE.

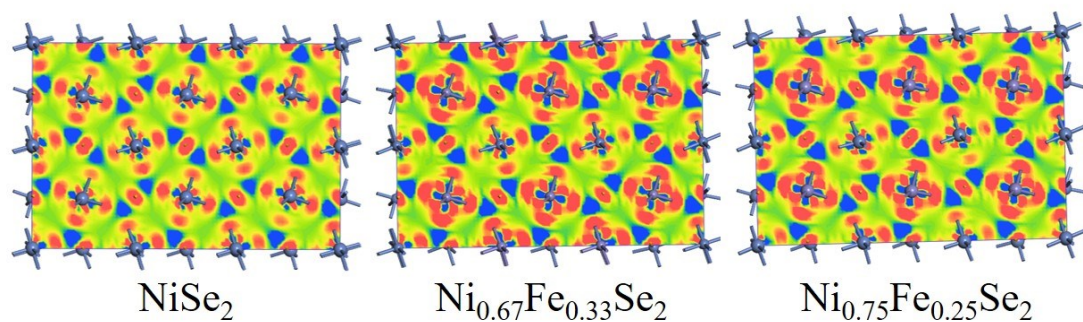

**Figure S34.** Charge density difference of NiSe<sub>2</sub>; Ni<sub>0.67</sub>Fe<sub>0.33</sub>Se<sub>2</sub> and Ni<sub>0.75</sub>Fe<sub>0.25</sub>Se<sub>2</sub>. In this plot a loss of electrons is indicated in blue, while electron enrichment is indicated in red.

**Table S1.** Calculated Ni/Fe ratio of NiFe-LDH from ICP-AES.

|                   | <b>Sample</b>                              | <b>Ni</b> | <b>Fe</b> |
|-------------------|--------------------------------------------|-----------|-----------|
|                   | Ni <sub>0.67</sub> Fe <sub>0.33</sub> -LDH | 2.06      | 1         |
| <b>Atom ratio</b> | Ni <sub>0.75</sub> Fe <sub>0.25</sub> -LDH | 3.09      | 1         |
|                   | Ni <sub>0.80</sub> Fe <sub>0.20</sub> -LDH | 3.93      | 1         |

**Table S2.** Calculated Ni/Fe ratio of NiFe-selenide from ICP-AES.

|                   | <b>Sample</b>                                         | <b>Ni</b> | <b>Fe</b> |
|-------------------|-------------------------------------------------------|-----------|-----------|
|                   | Ni <sub>0.67</sub> Fe <sub>0.33</sub> Se <sub>2</sub> | 2.13      | 1         |
| <b>Atom ratio</b> | Ni <sub>0.75</sub> Fe <sub>0.25</sub> Se <sub>2</sub> | 3.04      | 1         |
|                   | Ni <sub>0.80</sub> Fe <sub>0.20</sub> Se <sub>2</sub> | 3.86      | 1         |

**Table S3.** Summary of the representative noble metal catalysts and iron-based catalysts on electrocatalytic N<sub>2</sub> fixation.

| Catalyst                                 | Electrolyte                                   | Yield rate                                               | FE %  | Testing method         | Ref |
|------------------------------------------|-----------------------------------------------|----------------------------------------------------------|-------|------------------------|-----|
| Pt/C                                     | phosphate buffer solution                     | 4.5 $\mu\text{g h}^{-1} \text{mg}^{-1}_{\text{cat}}$     | 8.2   | indophenol blue method | 1   |
| Pd <sub>0.2</sub> Cu <sub>0.8</sub> /rGO | 0.1 M KOH                                     | 2.8 $\mu\text{g h}^{-1} \text{mg}^{-1}_{\text{cat}}$     | —     | indophenol blue method | 2   |
| AuSAs-NDPCs                              | 0.1 M HCl                                     | 2.32 $\mu\text{g h}^{-1} \text{mg}^{-1}_{\text{cat}}$    | 12.3  | indophenol blue method | 3   |
| Ru/MoS <sub>2</sub>                      | 0.01 M HCl                                    | 1.14 $\times 10^{-10} \text{ mol s}^{-1} \text{cm}^{-2}$ | 17.6  | indophenol blue method | 4   |
| THH Au NRs                               | 0.1 M KOH                                     | 1.648 $\mu\text{g h}^{-1} \text{cm}^{-2}$                | —     | Nessler's reagent      | 5   |
| Au HNCs                                  | 0.5 M LiClO <sub>4</sub>                      | 3.9 $\mu\text{g h}^{-1} \text{cm}^{-2}$                  | 30.2  | Nessler's reagent      | 6   |
| Ag nanosheet                             | 0.1 M HCl                                     | 4.62 $\times 10^{-11} \text{ mol s}^{-1} \text{cm}^{-2}$ | 4.8   | indophenol blue method | 7   |
| Fe/Fe <sub>3</sub> O <sub>4</sub>        | phosphate buffer solution                     | 0.19 $\mu\text{g h}^{-1} \text{mg}^{-1}_{\text{cat}}$    | 8.29  | indophenol blue method | 8   |
| FeSAs-N-C                                | 0.1 M KOH                                     | 7.48 $\mu\text{g h}^{-1} \text{mg}^{-1}_{\text{cat}}$    | 56.55 | indophenol blue method | 9   |
| FeSAs-MoS <sub>2</sub>                   | 0.5 M K <sub>2</sub> SO <sub>4</sub> (pH = 3) | 8.63 $\mu\text{g h}^{-1} \text{mg}^{-1}_{\text{cat}}$    | 18.8  | indophenol blue method | 10  |

## Ref.

- 1 J. Wang, L. Yu, L. Hu, G. Chen, H. Xin and X. Feng, Ambient ammonia synthesis via palladium-catalyzed electrohydrogenation of dinitrogen at low overpotential, *Nat. Commun.*, 2018, **9**, 1795.
- 2 M.-M. Shi, D. Bao, S.-J. Li, B.-R. Wulan, J.-M. Yan and Q. Jiang, Anchoring PdCu Amorphous Nanocluster on Graphene for Electrochemical Reduction of N<sub>2</sub> to NH<sub>3</sub> under Ambient Conditions in Aqueous Solution, *Adv. Energy Mater.*, 2018, **8**, 1800124.
- 3 Q. Qin, T. Heil, M. Antonietti and M. Oschatz, Single-Site Gold Catalysts on Hierarchical N-Doped Porous Noble Carbon for Enhanced Electrochemical Reduction of Nitrogen, *Small Methods*, 2018, **2**, 1800202.
- 4 B. H. R. Suryanto, D. Wang, L. M. Azofra, M. Harb, L. Cavallo, R. Jalili, D. R. G. Mitchell, M. Chatti and D. R. MacFarlane, MoS<sub>2</sub> Polymorphic Engineering Enhances Selectivity in the Electrochemical Reduction of Nitrogen to Ammonia, *ACS Energy Lett.*, 2018, **4**, 430.
- 5 D. Bao, Q. Zhang, F. L. Meng, H. X. Zhong, M. M. Shi, Y. Zhang, J. M. Yan, Q. Jiang and X. B. Zhang, Electrochemical Reduction of N<sub>2</sub> under Ambient Conditions for Artificial N<sub>2</sub> Fixation and Renewable Energy Storage Using N<sub>2</sub>/NH<sub>3</sub> Cycle, *Adv. Mater.*, 2017, **29**, 1604799.
- 6 M. Nazemi, S. R. Panikkanvalappil and M. A. El-Sayed, Enhancing the rate of



- electrochemical nitrogen reduction reaction for ammonia synthesis under ambient conditions using hollow gold nanocages, *Nano Energy*, 2018, **49**, 316.
- 7 H. Huang, L. Xia, X. Shi, A. M. Asiri and X. Sun, Ag nanosheets for efficient electrocatalytic N<sub>2</sub> fixation to NH<sub>3</sub> under ambient conditions, *Chem. Commun.*, 2018, **54**, 11427.
  - 8 L. Hu, A. Khaniya, J. Wang, G. Chen, W. E. Kaden and X. Feng, Ambient electrochemical ammonia synthesis with high selectivity on Fe/Fe oxide catalyst, *ACS Catal.*, 2018, **8**, 9312.
  - 9 M. Wang, S. Liu, T. Qian, J. Liu, J. Zhou, H. Ji, J. Xiong, J. Zhong and C. Yan, Over 56.55% Faradaic efficiency of ambient ammonia synthesis enabled by positively shifting the reaction potential, *Nat. Commun.*, 2019, **10**, 341.
  - 10 H. Su, L. Chen, Y. Chen, Y. Wu, X. Wu, R. Si, W. Zhang, Z. Geng and J. Zeng, Single Atoms of Iron on MoS<sub>2</sub> Nanosheets for N<sub>2</sub> Electroreduction into Ammonia, *Angew. Chem., Int. Ed.*, 2020, DOI: 10.1002/anie.202009217.
